## Title

Frequency of mutations in 21 hereditary breast and ovarian cancer susceptibility genes among high-risk Chinese individuals

## Running title

Frequency of HBOC susceptibility gene mutations

## Authors and affiliations

Di Shao<sup>123#</sup>, Shaomin Cheng<sup>12#</sup>, Fengming Guo<sup>12#</sup>, Yuying Yuan<sup>1#</sup>, Kunling Hu<sup>12</sup>, Zhe Wang<sup>1</sup>, Xuan Meng<sup>1</sup>, Xin Jin<sup>1</sup>, Yun Xiong<sup>1</sup>, Xianghua Chai<sup>1</sup>, Hong Li<sup>1</sup>, Yu Zhang<sup>1</sup>, Hongyun Zhang<sup>1</sup>, Jihong Liu<sup>4\*</sup>, Mingzhi Ye<sup>12\*</sup>

1. BGI Genomics, BGI-Shenzhen, Shenzhen 518083, China
2. BGI-Guangzhou Medical Laboratory, BGI-Shenzhen, Guangzhou 510006, China.
3. Laboratory of Genomics and Molecular Biomedicine, Department of Biology, University of Copenhagen, Copenhagen, Denmark.
4. Department of Gynecology, Sun Yat-sen University Cancer Center, Guangzhou, China.

Di Shao, Shaomin Cheng, and Fengming Guo, contributed equally to this article.

Correspondence to:

Prof. Jihong Liu, Department of Gynecology, Sun Yat-sen University Cancer Center, 651 Dongfeng East Road, Guangzhou 510060, China;

E-mail: liujih@mail.sysu.edu.cn

Dr. Mingzhi Ye, BGI Genomics, Beishan Industrial Zone, Yantian District, Shenzhen 518083, China.

E-mail: yemingzhi@genomics.cn

### **Conflict of interest**

Di Shao, Shaomin Cheng, Fengming Guo, Kunling Hu, Yuying Yuan, Zhe Wang, Xuan Meng, Xin Jin, Yun Xiong, Xianghua Chai, Hong Li, Yu Zhang, Hongyun Zhang and Mingzhi Ye are employees of BGI Genomics that produces the 21-gene panel test used in this study.

## **Translational relevance**

Multiple high- and moderate- penetrance genes (including *BRCA1* and *BRCA2*) have been discovered as susceptibility genes for hereditary breast and ovarian cancer. Recent advances in next generation sequencing (NGS) have provided an efficient method to evaluate these susceptibility genes simultaneously. We assessed the frequency of mutations in 21 susceptibility genes in a large cohort of subjects who were referred for genetic testing. The cohort is from several comprehensive hospitals with a wide geographical distribution representing the overall situation of the Chinese population. The prevalence of mutations in this population has been rarely reported in previous studies. Our results reflect the mutation frequency in individuals defined by guidelines and have great clinical practical significance.

## Abstract

**Purpose:** To determine the prevalence and clinical prediction factors associated with deleterious mutations among 882 high-risk Chinese individuals who underwent multigene panel testing for hereditary breast and ovarian cancer (HBOC) risk assessment.

**Experimental Design:** Subjects were selected from individuals referred for genetic testing using a 21-gene panel (Oseq-BRCA) between January 2015 and March 2018. The distribution and prevalence of deleterious mutations were analyzed for the full cohort as well as subtypes.

**Results:** Overall, 176 deleterious mutations were observed in 19.50% (n = 172) individuals. Of these, 26 mutations are not reported in public databases and literatures. In the ovarian cancer only subgroup, 115 deleterious mutations were identified in 429 patients (48.6%). Patients with ovarian cancer with mutations were enriched for a family history of breast or ovarian cancers ( $p < 0.05$ ). In the breast cancer only subgroup, 31 deleterious mutations were identified in 261 patients. Most mutations occurred in *BRCA1* (8; 25.8%) and *BRCA2* (11; 35.5%). An additional 12 deleterious mutations (38.7%) were found in 7 other susceptibility genes. An increased frequency of mutation rate (57.9%) was observed in the subgroup of subjects with histories of both breast and ovarian cancer.

**Conclusions:** 19.50% of individuals carried a deleterious mutation in HBOC susceptibility genes in our cohort. Subgroup of subjects with histories of both breast and ovarian cancer had the highest prevalence of mutations. Our results highlighted the genetic heterogeneity of HBOC and the efficiency of multigene panel in performing risk assessment.

## Keywords

HBOC, *BRCA1*, *BRCA2*, NGS

## 1 Introduction

Breast cancer is one of the most common malignant tumors in females (1). The increasing rate of morbidity in China is currently the highest in the world (2). Although ovarian cancer is less common than breast cancer, its mortality is high (2). Inherited mutations of *BRCA1* and *BRCA2* are pathogenetic in a majority of hereditary breast and ovarian cancer (HBOC) patients (3-4). In addition to *BRCA1* and *BRCA2*, the vast majority of existing studies have confirmed associations with other genes such as *ATM*, *BRIP1*, *CHEK2*, *RAD50*, *RAD51C*, and *TP53* (5-8). Moreover, it has been indicated that *TP53*, *PTEN*, *STK11*, and *CDH1* mutation carriers who may suffer from Li-Fraumeni syndrome, Cowden syndrome, Peutz–Jeghers syndrome, and hereditary diffuse gastric cancer syndrome, respectively, have high risks of breast cancer (9-13).

In consideration of associations between genes and disease, the National Comprehensive Cancer Network (NCCN) recommends genetic testing of 19 genes in breast and ovarian cancer patients (14). Timely and effective genetic testing could provide professional counseling and clinical management for patients and at-risk relatives. As *BRCA1/2* carriers display the high sensitivity to inhibitors of poly-ADP-ribose polymerase (PARP), genetic testings could also help patients in choosing therapies (15,16).

The traditional genetic testing methods, such as Sanger sequencing, polymerase chain reaction(PCR)-sequencing assay, and denaturing gradient gel electrophoresis (DGGE) mutation scanning system have been applied to detect *BRCA1/2* widely in China (8,17). However, *BRCA1/2* are high-risk tumor suppressor genes without significant mutation hotspots; as a result, some mutations would be missed by conventional approaches. Results from recent studies confirmed that NGS showed multiple advantages in cancer genetic testing in terms of time and cost effectiveness (18-20). However, there is insufficient related reports on HBOC patients of the Chinese population.

To investigate the mutation frequency among patients with a suspected HBOC risk in Chinese population, we used multi-gene testing to reveal the distribution and prevalence of deleterious germline mutations among 882 patients with a suspected HBOC risk in 21 HBOC heredity susceptible genes. Our results evaluated the benefits and limitations of multi-gene panel testing and provided insights of choosing appropriate multi-gene tests to diagnose hereditary cancer predisposition.

## 2 Materials and Methods

### 2.1 Participants

Subjects were selected from patients referred for genetic testing using a 21 gene panel Oseq-BRCA (BGI Genomics, Shenzhen, China) between January 2015 and March 2018. The patient enroll criteria of this study were based on the current National Comprehensive Cancer Network guidelines (NCCN) for

---

genetic risk evaluation for HBOC (14). Demographic and clinical information, including gender, personal cancer history, and family cancer history, were collected from test requisition forms (TRFs) completed by ordering clinicians at the time of testing. All patients signed informed consents approved by the Institutional Review Boards of BGI Genomics.

## **2.2 NGS library construction and gene capture**

Genomic DNA (gDNA) was extracted from participants' peripheral blood samples using the Qiagen Blood Midi Kit (Qiagen, Hilden, Germany). DNA concentration and quality were assessed by Qubit (Life Technologies, Gaithersburg, MD, USA) and agarose gel electrophoresis. Genomic DNA (250 ng) was used for the sequencing library construction. Briefly, the gDNA was fragmented randomly by the Covaris LE220 sonicator (Woburn, MA) to generate gDNA fragments with a peak of 250 bp and then subjected to three enzymatic steps: end-repair, A-tailing, and adapter ligation. DNA libraries were purified with Agencourt Ampure XP beads (Beckman-Coulter, Indiana, USA), and PCR was performed during which a unique 8 bp barcode was added to label each sample. Five to ten PCR products were pooled equally and hybridized to a custom hereditary cancer panel (Roche NimbleGen, Madison, USA). Hybridization product was subsequently purified, amplified, and qualified. Finally, sequencing was performed with paired end and barcode on the BGISEQ-500 sequencer or Hiseq 2000 (Illumina, San Diego, CA) following the manufacturer's protocols.

## **2.3 Sequencing data analysis and mutation calling**

Raw fastq data generated by the sequencer was first filtered by SOAPnuke to exclude low quality reads. The clean reads were then aligned to the reference human genome (UCSC hg19) using the BWAALN algorithm. Single nucleotide variants (SNVs) were detected by the Genome Analysis Toolkit (GATK) UnifiedGenotyper. Small insertions and deletions (InDels) were called using GATK Haplotype. Copy number variants (CNVs) were called using read-depth analysis. All above variants were further filtered by quality depth, strand bias, mapping quality, and reads position. Finally, each variant was annotated with respect to gene location and predicted function in Human Genome Variation Society (HGVS) nomenclature and was ready prepared for interpretation.

## **2.4 Data interpretation**

Interpretation was focused on variants in the selected 21 HBOC susceptibility genes (Table 1). These 21 genes were selected through NCCN guidelines and published research articles, and they include core genes in the FA pathway and homologous recombination genes (14). Variants were classified into the following 5 categories according to the American College of Medical Genetics (ACMG) recommendations: class 1, benign; class 2, likely benign; class 3, variant of uncertain significance (VUS); class 4, likely pathogenic (LP) ; and

---

class 5, pathogenic (P) (21). Population allele frequencies were collected from NCBI dbSNP, HapMap, 1000 human genome dataset, and an internal database of 100 Chinese healthy adults. Individuals with likely pathogenic or pathogenic variants were defined as having deleterious variants. Every deleterious variant was validated by qPCR, Sanger sequencing, or time of flight mass spectrometry.

### 3 Results

#### 3.1 Participant Characteristics

A total of 1,175 individuals were referred to our clinical test center for Oseq-BRCA multigene testing. After applying exclusion criteria of *BRCA1/2* TESTING in NCCN Guidelines for Genetic/Familial High-Risk Assessment: Breast and Ovarian, 882 participants were included in our study. Demographics for these 882 subjects are shown in Table 2. Age at diagnosis ranged from 13 to 80, with an average age of 47 years old. The majority of the subjects were women, 261 subjects with a personal history of breast cancer, 429 subjects had a personal history of ovarian cancer, and 19 had personal histories of both breast and ovarian cancer. Only 173 subjects were unaffected by cancer. Regarding family history information, 108 (12.2%) had at least one first- or second-degree relative with breast cancer only, and 96 (10.9%) had a relative with ovarian cancer only.

#### 3.2 Deleterious mutations identified in this cohort

Exons and splice sites of 21 HBOC susceptibility genes were examined for mutations by Oseq-BRCA in all 882 recruited participants. Overall, 176 deleterious (LP/P) mutations were observed in 19.50% (n = 172) individuals (Table 3). Of all these mutations, 89 (50.6%) were found in *BRCA1*, 49 (27.8%) in *BRCA2*, and 38 (21.6%) mutations in 14 other susceptibility genes (Figure 1A, Figure 2). In addition, 2 individuals with ovarian cancer carried mutations in both *BRCA1* and another gene (*TP53* or *MRE11A*). Additionally, 2 individuals with breast cancer had mutations in both *CHEK2* and another gene (*BRCA2* or *TP53*). Deleterious mutations were identified in all individual genes, except *ATM*, *PTEN*, *CDH1*, *BARD1* and *PMS2*.

In the breast cancer only subgroup (n = 261), 31 deleterious mutations were identified in 261 patients (Table 3). Most mutations occurred in *BRCA1* (66; 57.4%) and in *BRCA2* (33; 28.7%). An additional 16 mutations (13.9%) were found in 9 other susceptibility genes (Figure 1B). Deleterious *BRCA1* mutations consisted of 8 truncating (2 deletion, 2 frameshift, 2 nonsense, and 2 splice) mutations. Deleterious *BRCA2* mutations (2.7%) were 11 truncating mutations (9 frameshift, 2 nonsense). Among the other HR pathway genes, mutations were most commonly found in *CHEK2* (n = 5; 1.92%) and *BRIP1* (n = 2; 0.77%). In addition, mutations were also observed in *RAD51C*, *PALB2*, and *MRE11A* in 1 individual per gene. Only one Lynch syndrome gene mutation was identified in *PMS1* in the breast cancer subgroup. Among the other highly penetrant

---

genes, mutations were found in *TP53* (n = 1; 0.38%) while no mutations were identified in *STK11*, *PTEN*, and *CDH1*.

In the ovarian cancer only subgroup (n = 429), overall, 115 deleterious mutations were identified in 26.3% (n = 113) individuals (Table 3). Of these, 66 (57%) occurred in *BRCA1*, 33 (29%) in *BRCA2*, and 16 (14%) in 9 of 19 other susceptibility genes (Figure 1C). Deleterious *BRCA1* mutations consisted of 61 truncating (5 deletion, 35 frameshift, 16 nonsense and 5 splice) mutations and 5 known deleterious missense mutations. The 33 deleterious *BRCA2* mutations consisted of 30 truncating mutations (1 deletion, 19 frameshift, 7 nonsense, and 3 splice mutations) and 3 known deleterious missense mutations. Among the HR pathway genes, mutations were found most frequently in *BRIP1* (n = 5; 1.17%), and *RAD51C* (n = 2; 0.47%). Mutations were also identified in *CHEK2*, *MRE11A* and *RAD50* in 1 individual per gene. As for genes associated with Lynch syndromes genes (*MLH1*, *MSH2*, *MSH6*, *PMS1*, *PMS2*), deleterious mutations were identified in *MSH2* (n = 3) and *MSH6* (n = 1), accounting for 3.5% (n = 4) of all mutations in the ovarian cancer subgroup. Among the other highly penetrant genes, mutations were found in *TP53* (n = 1; 0.23%) and *STK11* (n = 1; 0.23%).

In the subgroup of subjects with disease histories of both breast and ovarian cancer (n = 19) (Table 3), a higher frequency of mutation rate was observed. Eleven (57.9%) subjects in this subgroup had a mutation, including 10 with a mutation in *BRCA1*, and 1 with a *MUTYH* mutation (Figure 1D).

Further, 173 subjects were unaffected by cancer. They were recruited due to family cancer history. In this subgroup, only 19 mutations were identified in 21 cancer susceptibility genes with a prevalence of 11.0% (Table 3), in which 10 had mutation in *BRCA1/2* genes, 2 in *BRIP1*, 2 in *MLH1*, 1 in *CHEK2*, 1 in *MRE11A*, 1 in *NBN*, 1 in *RAD51C*, and 1 in *MUTYH*. No mutations were found in *PALB2*, *RAD50*, *STK11*, *TP53*, *MSH2*, *MSH6*, and *PMS1* genes.

### **3.3 Recurrent mutations, founder mutations, and novel mutations**

In our cohort, recurrent mutations (n ≥ 3) were found in *BRCA1* p.Ile1824AspfsX3, *CHEK2* p.His371Tyr, *BRCA1* p.Glu1257GlyfsX9, and *BRCA2* p.Ser2670Leu (Table S1). And *BRCA1* p.Ile1824AspfsX3 was also one of Chinese founder mutations. The other Chinese founder mutations included *BRCA1* p.Cys328\*, *BRCA2* p.Thr3033Asnfs\*11, and *BRCA2* p.Gln1037Ter. No Ashkenazi Jewish or European founder mutations were observed. We confirmed 26 novel mutations that are not reported in public databases (ClinVar, UMD, LOVD, BIC) and literature. Of these, 7 in *BRCA1* (p.Val14Glyfs\*3, p.Asn298LysfsX2, p.Asn599Ilefs\*13, p.Phe901Leufs\*99, p.Glu1288Glnfs\*18, p.Arg1753Ter, p.Glu1849Ter), 9 in *BRCA2* (p.Ser942Glnfs\*18, p.Asn1066Lysfs\*1, p.Asn1287LysfsX6, p.Lys1765Glnfs\*13, p.Asp1868Valfs\*5, p.Thr2125Asnfs\*4, p.Pro2827Leufs\*36, p.Ser3080CysfsX30, p.Asn3124Glnfs\*26) (Figure 2), 3 in *BRIP1* (p.Ser206Ter, p.Ser230Ter,



---

p.Lys998AsnfsX5), 3 in RAD51C (p.Ser231Ter, p.Gln62Ter, p.Val41Glyfs\*18), and 1 in CHEK2 (Leu303\_E8splice), MSH2 (p.Asn412Metfs\*22), NBN (p.Asn639Argfs\*6), PMS1 (p.Tyr90\*), respectively.

### **3.4 Variants of uncertain significance (VUS)**

The total uncertain genetic effects rate in our cohort was 38.55% (n = 340), and 406 (339 missense, 58 splice, 4 inframe, 2 frameshift, 2 duplication, 1 deletion) VUS mutations were detected in 882 individuals. *ATM* accounted for up to 53, followed by 29 VUS in *BRCA1* and 42 VUS in *BRCA2* (Figure 3). All the genes detected with mutation got a certain amount of data in VUS. In the mutation classification, except for *BRCA1* and *BRCA2*, other genes have insufficient interpretation of pathogenicity and benign polymorphism, resulting in a high proportion of VUS. Of these mutations, VUS were found most frequently in *MRE11A* p.Met157Val (n = 8), *BRIP1* p.Gln944Glu (n = 8), and *ATM* p.His42Arg (n = 8). In addition, *PMS1* p.Arg919Cys and *MSH6* p.Pro1082Ser were occurred in 6 individuals, respectively.

### **3.5 Mutation frequency in subgroup with different family histories and ages at diagnosis**

The deleterious mutation rate for each subgroup according to age at diagnosis is detailed in Table 4. In the breast cancer only subgroup, the average age of diagnosis among mutation positive probands was 39 years old compared to 40 years old for mutation negative probands (p = 0.66). In the ovarian cancer only cohort, the average age of ovarian cancer diagnosis was 53 among positive probands and 54 among mutation negative probands (p = 0.90). In the breast and ovarian cancer cohorts, age of diagnosis was slightly older among mutation negative individuals compared to those positive for a mutation, however, the difference was not significant (p = 0.41) (Table 4). We also evaluated whether patient subjects with deleterious mutations in the 21 susceptibility genes were associated with a greater family history of breast and/or ovarian cancers than nonmutated patient subjects (Table 5). Patient subjects of breast cancer with mutations were not significantly associated with a family history for either breast or ovarian cancer. However, patient subjects of ovarian with mutations were enriched for a family history of breast or ovarian cancers (p < 0.05) (Table 5).

## **4 Discussion**

### **4.1 The contribution of this study**

Using a HBOC multi-gene panel, we revealed the distribution and prevalence of deleterious germline mutations among 882 subjects who were high-risk individuals and referred for Oseq-BRCA testing. This test utilizes liquid solution hybridization-based target enrichment and next generation sequencing to identify all types of variants in 21 HBOC genes. Our results support the views that the panel testing could increase the diagnostic detection rate of deleterious germline mutation compared with testing for *BRCA1/2* mutations alone. In our

---

cohort, 172 (19.50%) subjects had a deleterious mutation, and 21.6% of deleterious mutations were in genes other than *BRCA1* and *BRCA2*. Previous studies have reported on the frequency of deleterious mutations with NGS based multi-gene testing. Our study is distinguished from other studies in the following ways. First, our large-size cohort is from several comprehensive hospitals with a wide geographical distribution representing the overall situation of the Chinese population. The prevalence of mutations in this population was rarely reported in previous studies. In addition, our cohort was selected according to the NCCN guidelines, including breast cancer patients, ovarian cancer patients, and high-risk volunteers. Our results reflect the mutation frequency in individuals defined by the guidelines and have great clinical practical significance.

#### **4.2 Comparison of mutation frequency with previous studies**

In the breast cancer only subgroup, the prevalence of *BRCA1* and *BRCA2* deleterious mutations were 3.07% and 4.21%, respectively. In a previous Chinese population-based study, Jie Sun et al. (28) reported that *BRCA1/2* deleterious mutations frequencies were 4.24% and 6.60% in early-onset breast cancer and familial breast cancer cohort, which is similar to our subgroup and those observed in other studies in China (29-30). However, the prevalence of *BRCA1/2* deleterious variants in breast cancer in other countries ranges from 9.3% to 18% (31-33). Among African Americans women, Churpek et al. (33) reported that the prevalence in deleterious mutations in *BRCA1 and BRCA2* genes was 10% and 8%, respectively. Differences in the definition of early-onset or familial breast cancer and genetic testing methods for hereditary breast cancer between studies may influence results. Previous studies demonstrated that 4%-5% patients carried deleterious mutations beyond *BRCA1/2*, which was consistent with our finding that 4.21% subgroup carried deleterious variants in neither *BRCA1* nor *BRCA2*. The third commonly mutated gene was *CHEK2* in our study, which encodes a checkpoint kinase 2 interacting with cell cycle regulators and DNA repair proteins. And the deleterious mutation of *CHEK2* would increase the risk of breast cancer (14). Five patients carried *CHEK2* deleterious mutations, 4 in p.His371Tyr and 1 in c.908+2T>A. Although the recurrent mutation p.His371Tyr in *CHEK2* marked as variant uncertain significance in ClinVar database, we interpreted as likely pathogenic variants. This mutation results in the change of a Histidine to a Tyrosine at position 371 of the *CHEK2*-encoded protein. Baloch A H et al. (40) found that the mutation occurred in a region of protein kinase activity that plays an important role in DNA damage repair. The mutation is a suspected disease-causing mutation with 1 strong pathogenicity (PV3: functional studies supportive of a damaging effect) (6) and 1 moderate pathogenicity (PM2 low frequency in 1000 Genomes Project). Noteworthy, our study found only 1 breast cancer patient carried *PALB2* but none of the patients carried *ATM*, comparing *ATM* and *PALB2* also commonly identified in other studies.

---

The frequency of *BRCA1/2* mutations was 23.07% in the ovarian cancer only subgroup, 15.38% for *BRCA1* and 7.69% for *BRCA2*. Overall, *BRCA1/2* accounted for 86% in hereditary ovarian cancer, and the *BRCA1* mutation rate was more pronounced than the *BRCA2* mutation rate in ovarian cancer patients, similar to both Ang Li et al. (22) (2018, n = 1331, *BRCA1* for 17.1% and *BRCA2* for 5.3%) and Norquist et al. (23) (2016, n = 1915, *BRCA1* for 9.5% and *BRCA2* for 5.1%). Interestingly and noteworthy, ovarian cancer carried *BRCA1/2* mutations in China was slightly higher than expected. As patients with tumors of ovarian origin in other country that found *BRCA1/2* deleterious mutations rates from 13% to 15% (23-25). Beyond *BRCA1/2*, 0.9% of the subgroup carried *BRIP1* (*BRCA1*-interacting protein C-terminal helicase 1), which is similar to other studies ranging from 0.8% to 1.5% (23,26). *BRIP1*, a member of the *BRCA*-Fanconi anemia DNA repair pathway, is one of ovarian cancer moderate-risk genes that mutations in the gene increased lifetime ovarian cancer risk of 10%-15% (27). Reviewing 5 patients with *BRIP1* deleterious mutations, 100% subjects had a family history of cancer (ovarian cancer, breast cancer, pancreatic cancer, colon cancer, gallbladder cancer) compared to 48.68% of all subjects had a family history of a cancer-carried deleterious mutation. This data suggests that *BRIP1* mutation may be the pathogenic cause in ovarian cancer patients with a family history of cancer. In reviewing the mutations in mismatch repair genes (*MMR*; *MLH1*, *MSH2*, *MSH6*, *PMS2*), mainly causing Lynch syndrome, were of low frequency in our subgroup (n = 4; 0.93%). However, in our cohort, *MMR* mutations only occurred on the *MSH2* and *MSH6* genes, and no mutations in *MLH1* were found, which is different from the spectrum of hereditary colorectal cancer. This phenomenon also occurred in the study of Norquist et al. (23) (7 of 8 *MMR* mutations occurred in *PMS2* or *MSH6*). In addition, although there is few *CHEK2*, *MRE11A*, *TP53*, and *RAD50* reported with increased risk of ovarian cancer in the NCCN genetic testing criteria, but we found one patient, respectively, in our study that carried the above mutations. Although the risk values of these genes are unknown, we cannot completely rule out these genes when doing genetic testings in ovarian cancer.

The subgroup of subjects with breast cancer complicated with ovarian cancer identified *BRCA1* and *MUTYH* deleterious mutations in our population. Ava Kwong et al. (34) (2018, n = 20) reported Chinese patients with breast cancer complicated with ovarian cancer carried 40% and 20% mutations in *BRCA1* and *BRCA2*, respectively. In Shulman, LP et al. (35), *BRCA1* and *BRCA2* mutation frequencies were 38.71% and 22.58%, and there were three other subjects carried *BRIP1*, *CHEK2*, and *MRE11A* mutations, respectively. Although the incidence of personal histories of both breast and ovarian is relatively low in domestic and international research, it is suggested that the frequency of *BRCA1* mutations in this type of concurrent population is higher than that of carrying *BRCA2* but more evidence is needed to support this point.

### **4.3 Variants of uncertain significance**

The rate of uncertain genetic effects in a similar multi-gene panel study (27 genes) was 32.7% (38). Gardner, S. A et al. (38) considered panels with fewer genes that include *BRCA1/2*, and they tended to have a higher positive rate and a lower VUS rate presumably due to a narrower range of indications guiding test uptake. However, VUS rate in our cohort was 38.55%, which is slightly higher than the results of foreign studies. It is possible that the incidence of breast cancer and ovarian cancer in the Chinese population is lower than that in foreign countries, and the variants are relatively sporadic.

*ATM* has the most frequent VUS detected due to the long transcript length. When we exclude the length of CDS to make comparisons, it shows that *RAD51C* has the greatest number of VUS in per 1000 base, up to 14.15 (Table S2). According to the NCCN guidelines, *RAD51C* specifically increases the risk of ovarian cancer. In our ovarian cancer patients, only one mutation of *RAD51C* was detected, which is relatively low compared with foreign populations (36). This may due to the lack of reports on *RAD51C* in Chinese population, and some variants in our result need to be adjusted to the level of the disease-causing gene.

We amended *BRCA1* (c.5357T>C, c.5504G>A, c.5089T>C, c.101C>A) from uncertain significance to likely pathogenic through a combination of ClinVar reports, examinees' phenotypes, and references (37). However, the evidence for these variants is not currently sufficient, and it would be better to do more functional tests. In addition, we amended *BRCA1*(c.5347A>C, c.266T>C, c.154C>T) to be likely benign variants.

### **4.4 Clinical impact of deleterious mutations detection**

The identification of a deleterious variants in a cancer susceptibility gene allows identification of eligible patients for surveillance screening, and it may provide targeted therapy and prevention strategies for both patients and family members. Clinical interventions and recommendations of *BRCA1* and *BRCA2* mutation carriers have been well established and widely used in clinical practice. Most genes in our panels (*CDH1*, *MSH2*, *MLH1*, *MSH6*, *PMS2*, *PTEN*, *STK11*, and *TP53*) had corresponding current management suggestions in the NCCN guidelines. However, management guidelines for other moderate penetrance genes (*BARD1*, *RAD50*, *ATM*, *BRIP1*, *CHEK2*, *NBN*, *PALB2*, *RAD51C*) are not available, mutation in these genes were found in 2.60% subjects. When encountering these mutations, it is a big challenge for clinicians. It is necessary to combine the family history and personal history to make a medical decision. Therefore, guidelines recommend that multi-gene testing is ideal in the context of professional genetic expertise for pre- and post-test counseling.

#### **4.5 Conclusion**

Here, we reported the successful utility of multiple gene testing for identification of HBOC relevant risk gene mutations in a large number of individuals referred for genetic testing. This is the first clinical investigation of the mutation spectrum with a multiple gene panel among high-risk Chinese individuals with a suspected HBOC risk. Results of this study indicated that multi-gene panel testing can identify more individuals with relevant cancer risk gene mutations than *BRCA1/2* genetic testing alone. Although current NCCN guidelines recommend the management of patients with mutations in the majority of risk genes, the clinicians should be prepared to deal with the VUS and mutations in moderate penetrance genes. Our findings provide insights for the clinician to consider multi-gene tests to diagnose cancer predisposition in clinical practice.

#### **Acknowledgments**

This work was supported by National Key R&D Program of China (2016YFC0905400), Guangzhou Science and Technology Plan Projects (Health Medical Collaborative Innovation Program of Guangzhou, 201400000004-5 and 201803040019) and Special Foundation for High-level Talents of Guangdong (2016TX03R171).

---

## References

1. Siegel R, Naishadham D, Jemal A. Cancer statistics, 2013. *CA Cancer J Clin* **2013**;63:11-30 doi 10.3322/caac.21166.
2. Chen W, Zheng R, Baade PD, Zhang S, Zeng H, Bray F, *et al.* Cancer statistics in China, 2015. *CA: A Cancer Journal for Clinicians* **2016**;66:115-32.
3. Koboldt DC, Fulton RS, Mclellan MD, Schmidt HK, Kalickiveizer J, Mcmichael JF, *et al.* Comprehensive molecular portraits of human breast tumours. *Nature* **2012**;490:61-70.
4. Cancer Genome Atlas Research N. Integrated genomic analyses of ovarian carcinoma. *Nature* **2011**;474:609-15 doi 10.1038/nature10166.
5. Meindl A, Hellebrand H, Wiek C, Erven V, Wappenschmidt B, Niederacher D, *et al.* Germline mutations in breast and ovarian cancer pedigrees establish RAD51C as a human cancer susceptibility gene. *Nature Genetics* **2010**;42:410-4.
6. Liu Y, Liao J, Xu Y, Chen W, Liu D, Ouyang T, *et al.* A recurrent CHEK2 p.H371Y mutation is associated with breast cancer risk in Chinese women. *Human Mutation* **2011**;32:1000-3.
7. Cao W, Wang X, Li JC. Hereditary breast cancer in the Han Chinese population. *J Epidemiol* **2013**;23:75-84.
8. Cao WM, Gao Y, Yang HJ, Xie SN, Ding XW, Pan ZW, *et al.* Novel germline mutations and unclassified variants of BRCA1 and BRCA2 genes in Chinese women with familial breast/ovarian cancer. *BMC Cancer* **2016**;16:64 doi 10.1186/s12885-016-2107-6.
9. Gonzalez KD, Noltner KA, Buzin CH, Gu D, Wen-Fong CY, Nguyen VQ, *et al.* Beyond Li Fraumeni Syndrome: clinical characteristics of families with p53 germline mutations. *J Clin Oncol* **2009**;27:1250-6 doi 10.1200/JCO.2008.16.6959.
10. FitzGerald MG, Marsh DJ, Wahrer D, Bell D, Caron S, Shannon KE, *et al.* Germline mutations in PTEN are an infrequent cause of genetic predisposition to breast cancer. *Oncogene* **1998**;17:727-31 doi 10.1038/sj.onc.1201984.
11. Hearle N, Schumacher V, Menko FH, Olschwang S, Boardman LA, Gille JJ, *et al.* Frequency and spectrum of cancers in the Peutz-Jeghers syndrome. *Clin Cancer Res* **2006**;12:3209-15 doi 10.1158/1078-0432.CCR-06-0083.
12. Schrader KA, Masciari S, Boyd N, Wyrick S, Kaurah P, Senz J, *et al.* Hereditary diffuse gastric cancer: association with lobular breast cancer. *Fam Cancer* **2008**;7:73-82 doi 10.1007/s10689-007-9172-6.
13. Walsh T, Lee MK, Casadei S, Thornton AM, Stray SM, Pennil C, *et al.* Detection of inherited mutations for breast and ovarian cancer using genomic capture and massively parallel sequencing. *Proc Natl Acad Sci U S A* **2010**;107:12629-33 doi 10.1073/pnas.1007983107.
14. Daly MB, Pilarski R, Berry M, Buys SS, Friedman S, Garder J, *et al.* NCCN Guidelines Insights: Genetic/Familial High-Risk Assessment: Breast and Ovarian, Version 2.2019.
15. Swisher EM, Lin KK, Oza AM, Scott CL, Giordano H, Sun J, *et al.* Rucaparib in relapsed, platinum-

- sensitive high-grade ovarian carcinoma (ARIEL2 Part 1): an international, multicentre, open-label, phase 2 trial. *Lancet Oncol* **2017**;18:75-87 doi 10.1016/S1470-2045(16)30559-9.
16. Kaufman B, Shapira-Frommer R, Schmutzler RK, Audeh MW, Friedlander M, Balmana J, *et al.* Olaparib monotherapy in patients with advanced cancer and a germline BRCA1/2 mutation. *J Clin Oncol* **2015**;33:244-50 doi 10.1200/JCO.2014.56.2728.
  17. van der Hout AH, van den Ouweland AM, van der Luijt RB, Gille HJ, Bodmer D, Bruggenwirth H, *et al.* A DGGE system for comprehensive mutation screening of BRCA1 and BRCA2: application in a Dutch cancer clinic setting. *Hum Mutat* **2006**;27:654-66 doi 10.1002/humu.20340.
  18. Kurian AW, Hare EE, Mills MA, Kingham KE, McPherson L, Whittemore AS, *et al.* Clinical evaluation of a multiple-gene sequencing panel for hereditary cancer risk assessment. *J Clin Oncol* **2014**;32:2001-9 doi 10.1200/JCO.2013.53.6607.
  19. LaDuca H, Stuenkel AJ, Dolinsky JS, Keiles S, Tandy S, Pesaran T, *et al.* Utilization of multigene panels in hereditary cancer predisposition testing: analysis of more than 2,000 patients. *Genet Med* **2014**;16:830-7 doi 10.1038/gim.2014.40.
  20. Desmond A, Kurian AW, Gabree M, Mills MA, Anderson MJ, Kobayashi Y, *et al.* Clinical Actionability of Multigene Panel Testing for Hereditary Breast and Ovarian Cancer Risk Assessment. *JAMA Oncol* **2015**;1:943-51 doi 10.1001/jamaoncol.2015.2690.
  21. Richards S, Aziz N, Bale S, Bick D, Das S, Gastier-Foster J, *et al.* Standards and guidelines for the interpretation of sequence variants: a joint consensus recommendation of the American College of Medical Genetics and Genomics and the Association for Molecular Pathology. *Genet Med* **2015**;17:405-24 doi 10.1038/gim.2015.30.
  22. Li A, Xie R, Zhi Q, Deng Y, Wu Y, Li W, *et al.* BRCA germline mutations in an unselected nationwide cohort of Chinese patients with ovarian cancer and healthy controls. *Gynecol Oncol* **2018**;151:145-52 doi 10.1016/j.ygyno.2018.07.024.
  23. Norquist BM, Harrell MI, Brady MF, Walsh T, Lee MK, Gulsuner S, *et al.* Inherited Mutations in Women With Ovarian Carcinoma. *JAMA Oncol* **2016**;2:482-90 doi 10.1001/jamaoncol.2015.5495.
  24. Walsh T, Casadei S, Lee MK, Pennil CC, Nord AS, Thornton AM, *et al.* Mutations in 12 genes for inherited ovarian, fallopian tube, and peritoneal carcinoma identified by massively parallel sequencing. *Proc Natl Acad Sci U S A* **2011**;108:18032-7 doi 10.1073/pnas.1115052108.
  25. Pal T, Permut-Wey J, Betts JA, Krischer JP, Fiorica J, Arango H, *et al.* BRCA1 and BRCA2 mutations account for a large proportion of ovarian carcinoma cases. *Cancer* **2005**;104:2807-16 doi 10.1002/cncr.21536.
  26. Ramus SJ, Song H, Dicks E, Tyrer JP, Rosenthal AN, Intermaggio MP, *et al.* Germline Mutations in the BRIP1, BARD1, PALB2, and NBN Genes in Women With Ovarian Cancer. *J Natl Cancer Inst* **2015**;107 doi 10.1093/jnci/djv214.
  27. Ring KL, Garcia C, Thomas MH, Modesitt SC. Current and future role of genetic screening in gynecologic malignancies. *Am J Obstet Gynecol* **2017**;217:512-21 doi

- 10.1016/j.ajog.2017.04.011.
28. Sun J, Meng H, Yao L, Lv M, Bai J, Zhang J, *et al.* Germline Mutations in Cancer Susceptibility Genes in a Large Series of Unselected Breast Cancer Patients. *Clin Cancer Res* **2017**;23:6113-9 doi 10.1158/1078-0432.CCR-16-3227.
29. Lang GT, Shi JX, Hu X, Zhang CH, Shan L, Song CG, *et al.* The spectrum of BRCA mutations and characteristics of BRCA-associated breast cancers in China: Screening of 2,991 patients and 1,043 controls by next-generation sequencing. *Int J Cancer* **2017**;141:129-42 doi 10.1002/ijc.30692.
30. Zhang J, Sun J, Chen J, Yao L, Ouyang T, Li J, *et al.* Comprehensive analysis of BRCA1 and BRCA2 germline mutations in a large cohort of 5931 Chinese women with breast cancer. *Breast Cancer Res Treat* **2016**;158:455-62 doi 10.1007/s10549-016-3902-0.
31. Buys SS, Sandbach JF, Gammon A, Patel G, Kidd J, Brown KL, *et al.* A study of over 35,000 women with breast cancer tested with a 25-gene panel of hereditary cancer genes. *Cancer* **2017**;123:1721-30 doi 10.1002/cncr.30498.
32. Tung N, Battelli C, Allen B, Kaldate R, Bhatnagar S, Bowles K, *et al.* Frequency of mutations in individuals with breast cancer referred for BRCA1 and BRCA2 testing using next-generation sequencing with a 25-gene panel. *Cancer* **2015**;121:25-33 doi 10.1002/cncr.29010.
33. Churpek JE, Walsh T, Zheng Y, Moton Z, Thornton AM, Lee MK, *et al.* Inherited predisposition to breast cancer among African American women. *Breast Cancer Res Treat* **2015**;149:31-9 doi 10.1007/s10549-014-3195-0.
34. Kwong A, Ho JCW, Shin VY, Kurian AW, Tai E, Esserman LJ, *et al.* Rapid detection of BRCA1/2 recurrent mutations in Chinese breast and ovarian cancer patients with multiplex SNaPshot genotyping panels. *Oncotarget* **2018**;9:7832-43 doi 10.18632/oncotarget.23471.
35. Walsh T, Casadei S, Lee MK, Pennil CC, Nord AS, Thornton AM, *et al.* Mutations in 12 genes for inherited ovarian, fallopian tube, and peritoneal carcinoma identified by massively parallel sequencing. *Proc Natl Acad Sci U S A* **2011**;108:18032-7 doi 10.1073/pnas.1115052108.
36. Lilyquist J, LaDuca H, Polley E, Davis BT, Shimelis H, Hu C, *et al.* Frequency of mutations in a large series of clinically ascertained ovarian cancer cases tested on multi-gene panels compared to reference controls. *Gynecol Oncol* **2017**;147:375-80 doi 10.1016/j.ygyno.2017.08.030.
37. Findlay GM, Daza R, Martin B, Zhang MD, Leith A, Gasperini M, *et al.* Accurate functional classification of thousands of BRCA1 variants with saturation genome editing. *bioRxiv* **2018**:294520.
38. Gardner SA, Weymouth KS, Kelly WS, Bogdanova E, Chen W, Lupu D, *et al.* Evaluation of a 27-gene inherited cancer panel across 630 consecutive patients referred for testing in a clinical diagnostic laboratory. *Hered Cancer Clin Pract* **2018**;16:1 doi 10.1186/s13053-017-0083-8.
39. Zhou X, Edmonson MN, Wilkinson MR, Patel A, Wu G, Liu Y, *et al.* Exploring genomic alteration in pediatric cancer using ProteinPaint. *Nat Genet* **2016**;48:4-6 doi 10.1038/ng.3466.
40. Baloch AH, Daud S, Raheem N, Luqman M, Ahmad A, Rehman A, *et al.* Missense mutations



(p.H371Y, p.D438Y) in gene CHEK2 are associated with breast cancer risk in women of Balochistan origin. *Mol Biol Rep* **2014**;41:1103-7 doi 10.1007/s11033-013-2956-x.

---

## Tables

**Table 1 List of the 21 tested genes**

---

| <b>Risk Category</b>       | <b>Genes</b> | <b>Gene names</b>                                                  |
|----------------------------|--------------|--------------------------------------------------------------------|
| BRCA1/2                    | 2            | <i>BRCA1, BRCA2</i>                                                |
| BRCA Pathway/Moderate Risk | 9            | <i>ATM, BARD1, BRIP1, CHEK2, MRE11A, NBN, PALB2, RAD50, RAD51C</i> |
| High Penetrant             | 4            | <i>CDH1, PTEN, STK11, TP53</i>                                     |
| Lynch Syndrome             | 5            | <i>MLH1, MSH2, MSH6, PMS1, PMS2</i>                                |
| Other Moderate Risk gene   | 1            | <i>MUTYH</i>                                                       |

---

**Table 2 Demography and clinical characteristics**

|                            | <b>Total</b><br>(n = 882) | <b>BC</b><br>(n = 261) | <b>OC</b><br>(n = 429) | <b>BC &amp; OC</b><br>(n = 19) | <b>FHx</b><br>(n = 173) |
|----------------------------|---------------------------|------------------------|------------------------|--------------------------------|-------------------------|
| <b>Sex</b>                 |                           |                        |                        |                                |                         |
| <b>Male</b>                | 29 (3.3%)                 | -                      | -                      | -                              | 29 (16.8%)              |
| <b>Female</b>              | 853 (96.7%)               | 261 (100%)             | 429 (100%)             | 19 (100%)                      | 144 (83.2%)             |
| <b>Age at testing (yr)</b> |                           |                        |                        |                                |                         |
| <b>[-,35]</b>              | 170                       | 78                     | 22                     | 0                              | 70                      |
| <b>(35,50)</b>             | 369                       | 165                    | 130                    | 5                              | 69                      |
| <b>[50, +]</b>             | 340                       | 17                     | 276                    | 14                             | 33                      |
| <b>NA</b>                  | 3                         | 1                      | 1                      | 0                              | 1                       |
| <b>Mean(±SD)</b>           | 47.0(±12)                 | 39.8(±7)               | 53.5(±10)              | 57.1(±10)                      | 40.4(±12)               |
| <b>Median</b>              | 47                        | 40                     | 54                     | 57                             | 38.5                    |
| <b>Range</b>               | 13-80                     | 20-62                  | 24-79                  | 39-80                          | 13-78                   |
| <b>Family history</b>      |                           |                        |                        |                                |                         |
| <b>BC</b>                  | 108                       | 30                     | 31                     | 0                              | 47                      |
| <b>OC</b>                  | 96                        | 3                      | 25                     | 2                              | 66                      |
| <b>BC &amp; OC</b>         | 21                        | 2                      | 3                      | 0                              | 16                      |

Abbreviations:

BC, Breast cancer; OC, Ovarian cancer; BC & OC, Breast and ovarian cancer; FHx, subjects recruited based on family cancer history; SD, standard deviation; NA, unknown

**Table3 Frequency of mutations by personal cancer history**

| Gene                              | No. of Individuals (%)   |                        |                          |                    |                  |
|-----------------------------------|--------------------------|------------------------|--------------------------|--------------------|------------------|
|                                   | Total<br>(n =882)        | BC<br>(n =261)         | OC<br>(n =429)           | BC & OC<br>(n =19) | FHx<br>(n =173)  |
| <b>BRCA1/2</b>                    |                          |                        |                          |                    |                  |
| <i>BRCA1</i>                      | 89 (10.09) <sup>cd</sup> | 8 (3.07)               | 66 (15.38) <sup>cd</sup> | 10 (52.63)         | 5 (2.89)         |
| <i>BRCA2</i>                      | 49 (5.56) <sup>a</sup>   | 11 (4.21) <sup>a</sup> | 33 (7.69)                | -                  | 5 (2.89)         |
| <b>BRCA Pathway/Moderate Risk</b> |                          |                        |                          |                    |                  |
| <i>BRIP1</i>                      | 9 (1.02)                 | 2 (0.77)               | 5 (1.17)                 | -                  | 2 (1.16)         |
| <i>CHEK2</i>                      | 7 (0.79) <sup>ab</sup>   | 5 (1.92) <sup>ab</sup> | 1 (0.23)                 | -                  | 1 (0.58)         |
| <i>MRE11A</i>                     | 3 (0.34) <sup>c</sup>    | 1 (0.38)               | 1 (0.23) <sup>c</sup>    | -                  | 1 (0.58)         |
| <i>NBN</i>                        | 1 (0.11)                 | -                      | -                        | -                  | 1 (0.58)         |
| <i>PALB2</i>                      | 1 (0.11)                 | 1 (0.38)               | -                        | -                  | -                |
| <i>RAD50</i>                      | 1 (0.11)                 | -                      | 1 (0.23)                 | -                  | -                |
| <i>RAD51C</i>                     | 4 (0.45)                 | 1 (0.38)               | 2 (0.47)                 | -                  | 1 (0.58)         |
| <b>High Penetrant</b>             |                          |                        |                          |                    |                  |
| <i>STK11</i>                      | 1 (0.11)                 | -                      | 1 (0.23)                 | -                  | -                |
| <i>TP53</i>                       | 2 (0.23) <sup>bd</sup>   | 1 (0.38) <sup>b</sup>  | 1 (0.23) <sup>d</sup>    | -                  | -                |
| <b>Lynch Syndrome</b>             |                          |                        |                          |                    |                  |
| <i>MLH1</i>                       | 2 (0.23)                 | -                      | -                        | -                  | 2 (1.16)         |
| <i>MSH2</i>                       | 3 (0.34)                 | -                      | 3 (0.70)                 | -                  | -                |
| <i>MSH6</i>                       | 1 (0.11)                 | -                      | 1 (0.23)                 | -                  | -                |
| <i>PMS1</i>                       | 1 (0.11)                 | 1 (0.38)               | -                        | -                  | -                |
| <b>Other Moderate Risk gene</b>   |                          |                        |                          |                    |                  |
| <i>MUTYH</i>                      | 2 (0.23)                 | -                      | -                        | 1 (5.26)           | 1 (0.58)         |
| <b>TOTAL</b>                      | <b>176(19.95)</b>        | <b>31(11.88)</b>       | <b>115(26.81)</b>        | <b>11(57.89)</b>   | <b>19(10.98)</b> |

<sup>a</sup>one subject had both *BRCA2* and *CHEK2* mutation

<sup>b</sup>one subject had both *CHEK2* and *TP53* mutation

<sup>c</sup>one subject had both *BRCA1* and *MRE11A* mutation

<sup>d</sup>one subject had both *BRCA1* and *TP53* mutation

---

**Table 4 Correlation between deleterious mutations and age in subgroup**

---

| <b>Age (yr)</b> | <b>BC</b> |       | <b>OC</b> |       | <b>BC &amp; OC</b> |       | <b>FHx</b> |       |
|-----------------|-----------|-------|-----------|-------|--------------------|-------|------------|-------|
|                 | Pos       | Neg   | Pos       | Neg   | Pos                | Neg   | Pos        | Neg   |
| <b>mean</b>     | 39.7      | 39.8  | 53.6      | 53.4  | 54.8               | 60.3  | 41.1       | 40.4  |
| <b>median</b>   | 39        | 40    | 53        | 54    | 52                 | 59    | 35         | 39    |
| <b>range</b>    | 26-56     | 20-62 | 27-76     | 24-79 | 44-68              | 39-80 | 27-71      | 13-78 |
| <b>p-value</b>  | 0.6643    |       | 0.9033    |       | 0.4083             |       | 0.9027     |       |

---

Pos = positive, carried deleterious mutation

Neg = negative, no deleterious mutation

---

**Table 5 Correlation between deleterious mutations and HBOC family history in subgroup**

---

|                                    | <b>BC</b> |     | <b>OC</b> |     |
|------------------------------------|-----------|-----|-----------|-----|
|                                    | Pos       | Neg | Pos       | Neg |
| <b>with HBOC family history</b>    | 6         | 29  | 37        | 22  |
| <b>without HBOC family history</b> | 23        | 203 | 76        | 294 |
| <b>p-value</b>                     | 0.246     |     | <0.05     |     |

---

## Figure legends

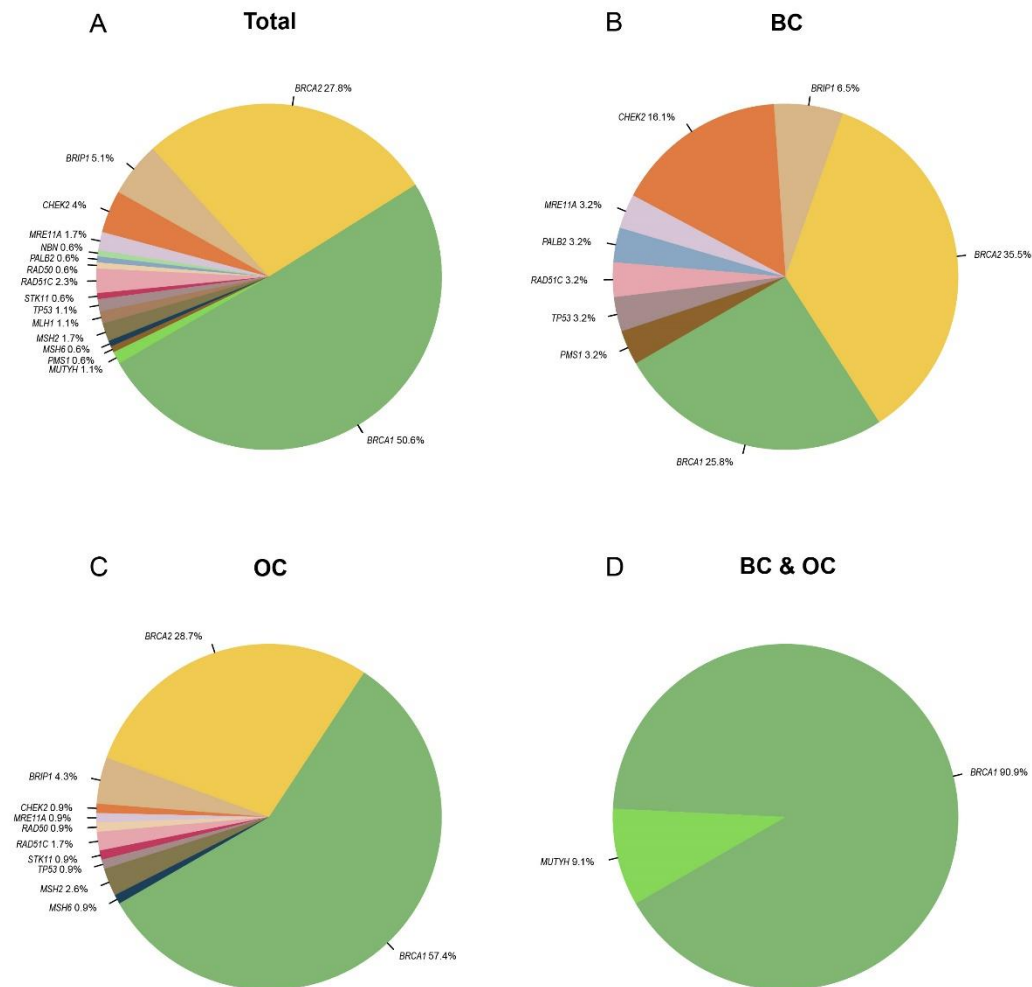

Figure 1 Deleterious mutation distribution in 21 HBOC susceptibility genes.

(A) Overall 176 deleterious mutations were distributed in 21 genes among 172 patients of 882 individuals. Note that due to rounding, the sum is over 100%. (B) In 261 patients with breast cancer only, distribution of 31 deleterious mutations in 21 genes was identified. (C) In 429 patients with ovarian cancer only, distribution of 115 deleterious mutations in 21 genes was identified. (D) Distribution of 11 deleterious mutations distribution in 21 genes was identified in 19 patients with both breast and ovarian cancer.

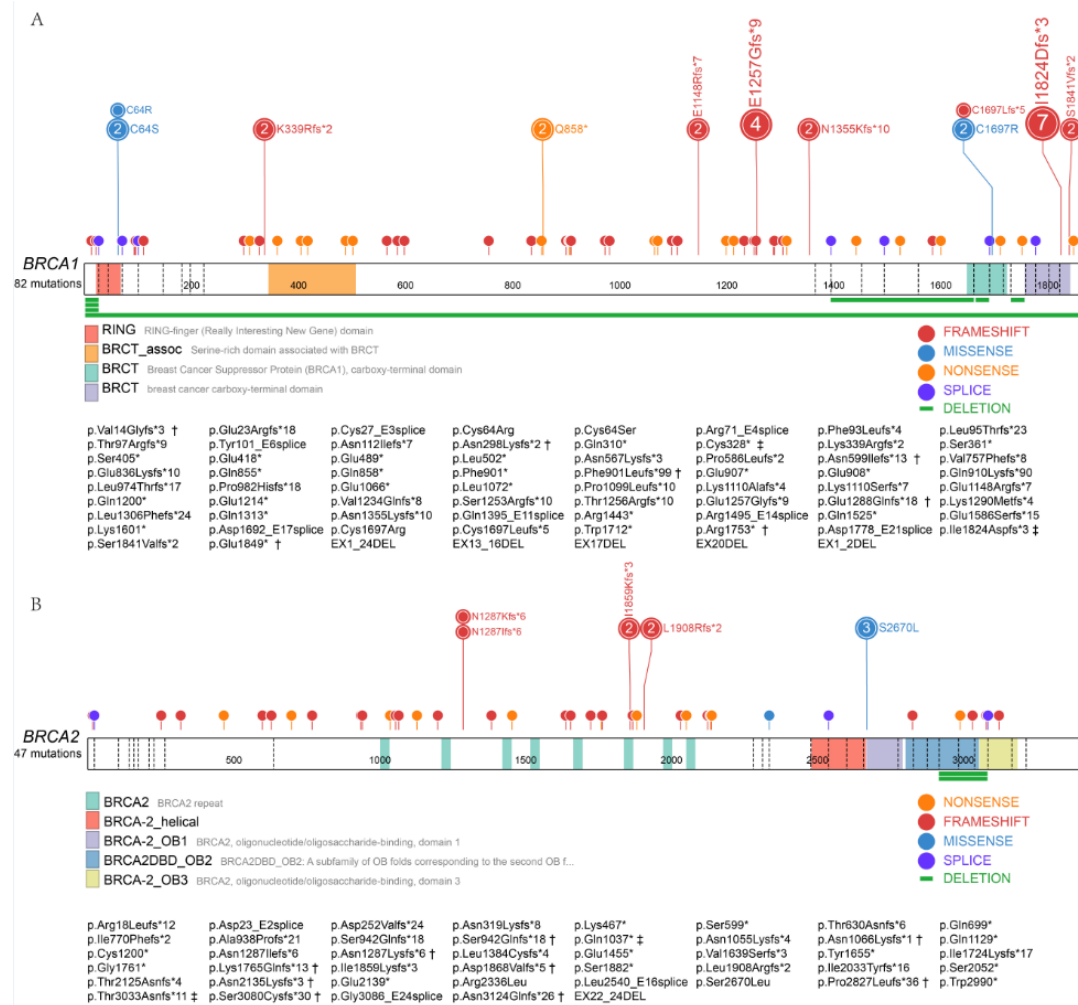

Figure 2 Spectrum of deleterious mutations detected in 882 individuals.

(A) The spectrum of deleterious mutations in *BRCA1* gene. (B) The spectrum of deleterious mutations in *BRCA2* gene. Sticks represent mutation positions. The number represents the number of samples with the mutation (the unmarked represents 1). The green bars represent the deletion locations, and each segment represents a sample. The figure was made using ProteinPaint. (39) † novel mutation; ‡ Chinese founder mutation



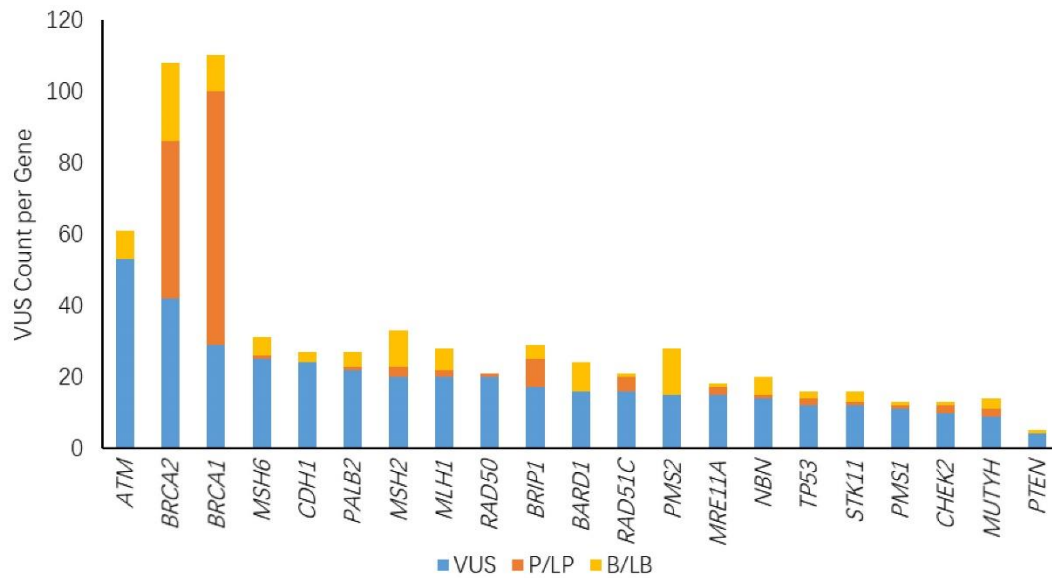

Figure 3 Overall proportion of VUS in 21 cancer susceptibility genes. VUS: variant of uncertain significance; P/LP: pathogenic or likely pathogenic; B/LB: benign or likely benign

### Supplementary Data

Supplement Table S1 List of deleterious mutations

Supplement Table S2 Number of VUS mutations per kb in 21 genes

Supplement Figure S1 Distribution of *BRCA1* and *BRCA2* deleterious mutations

**A****Total**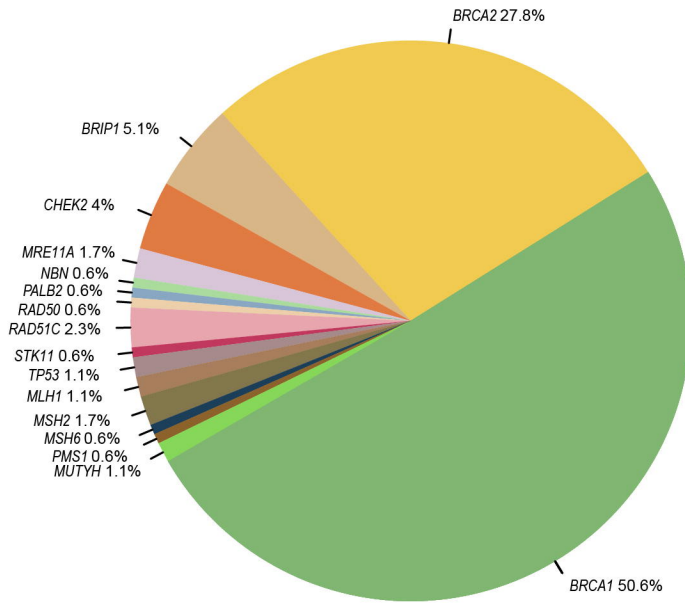**B****BC**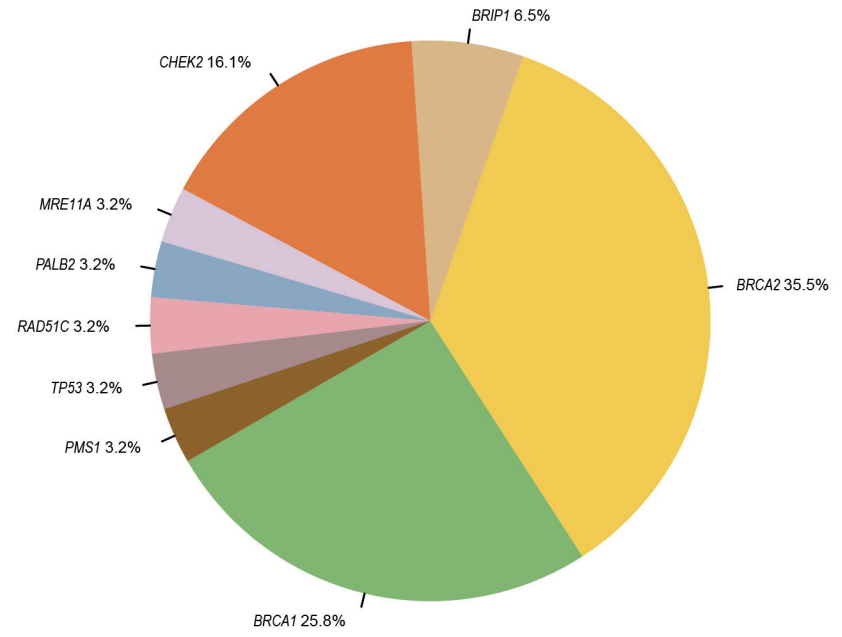**C****OC**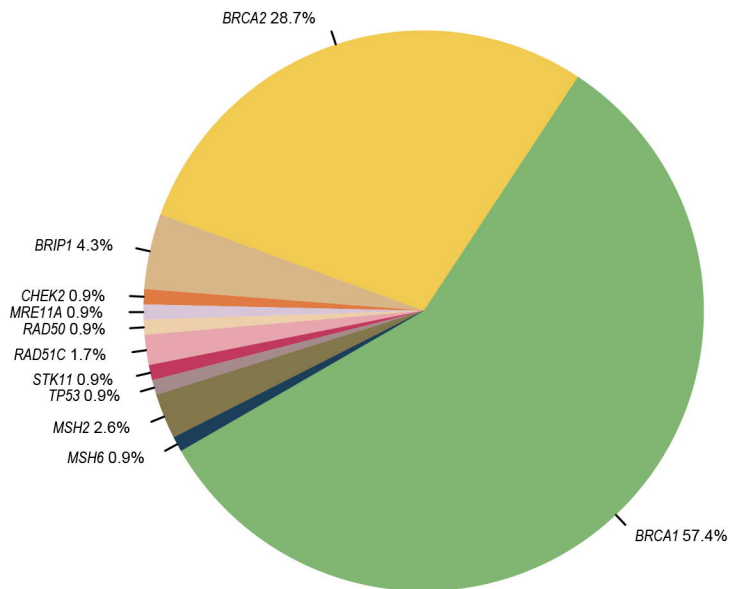**D****BC & OC**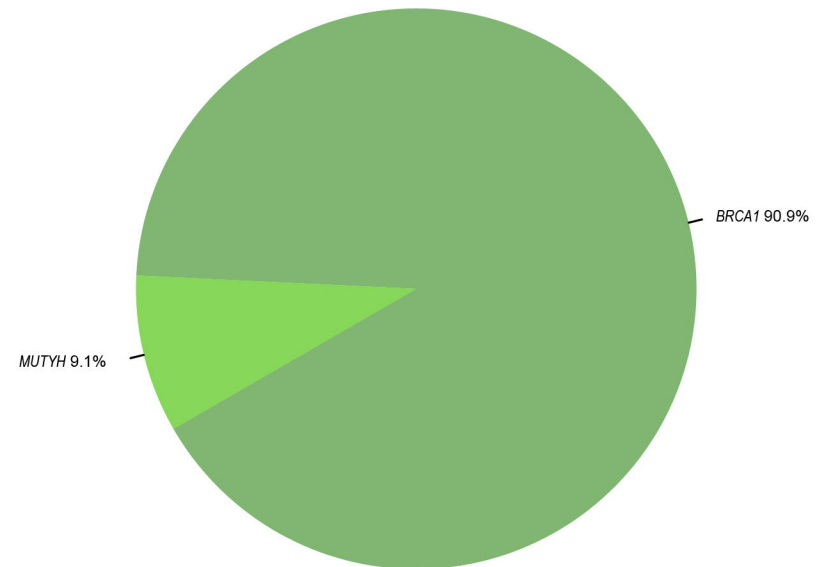

A

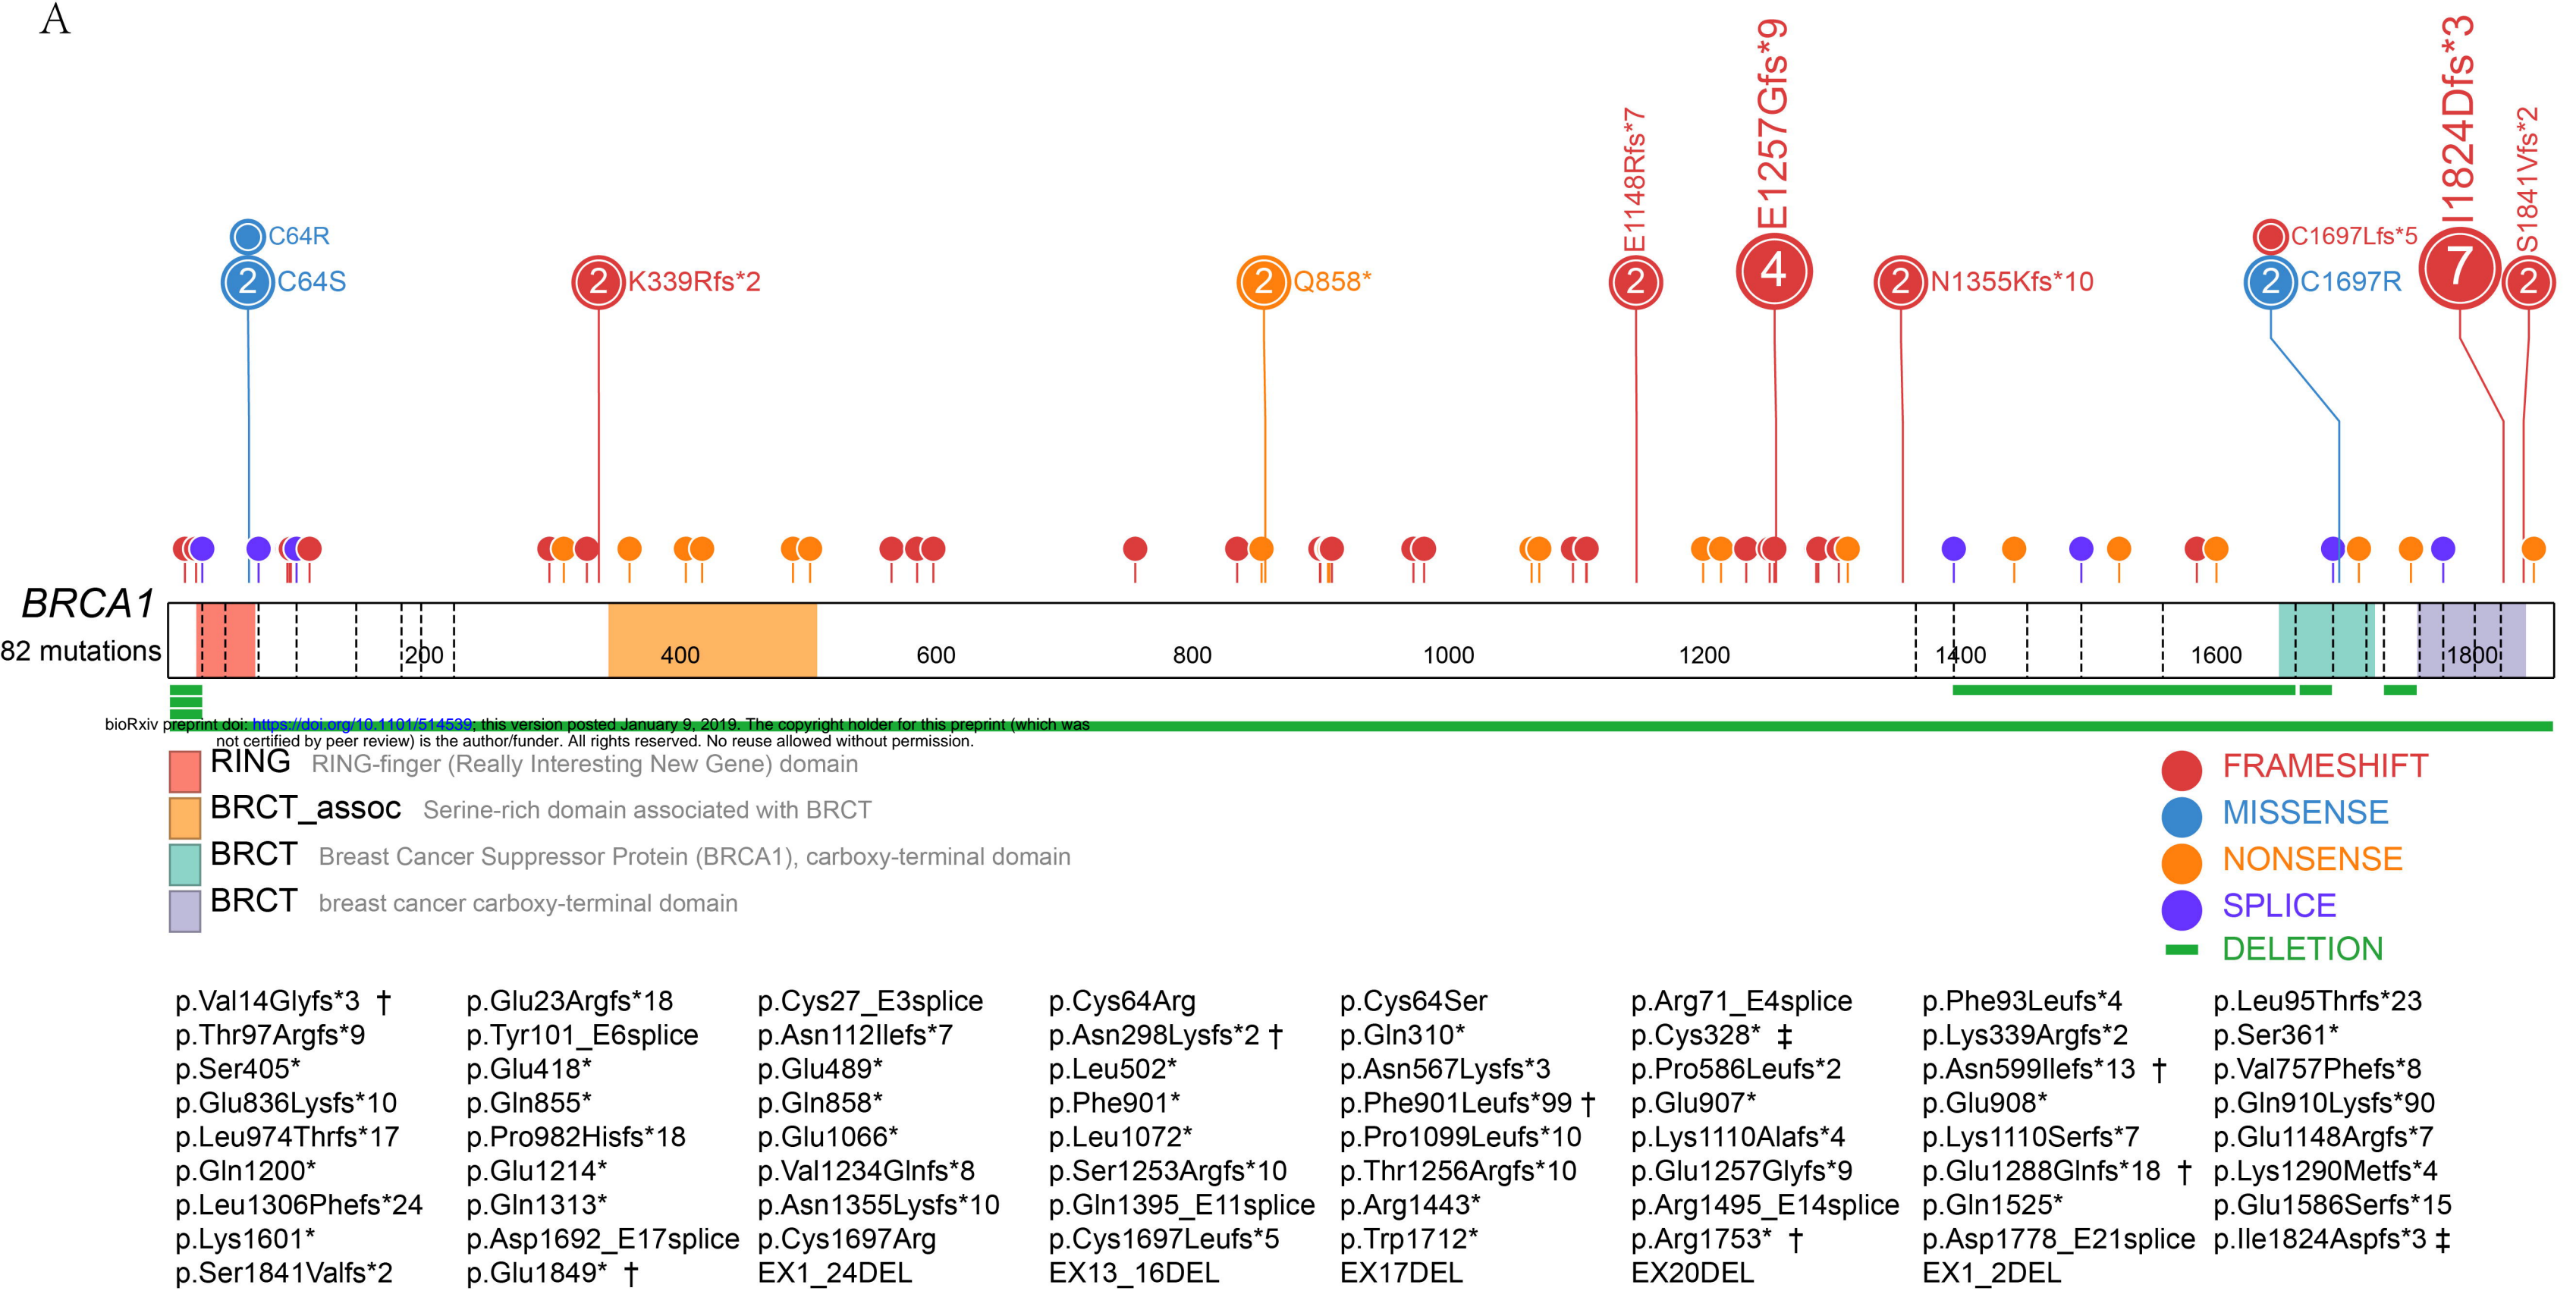

B

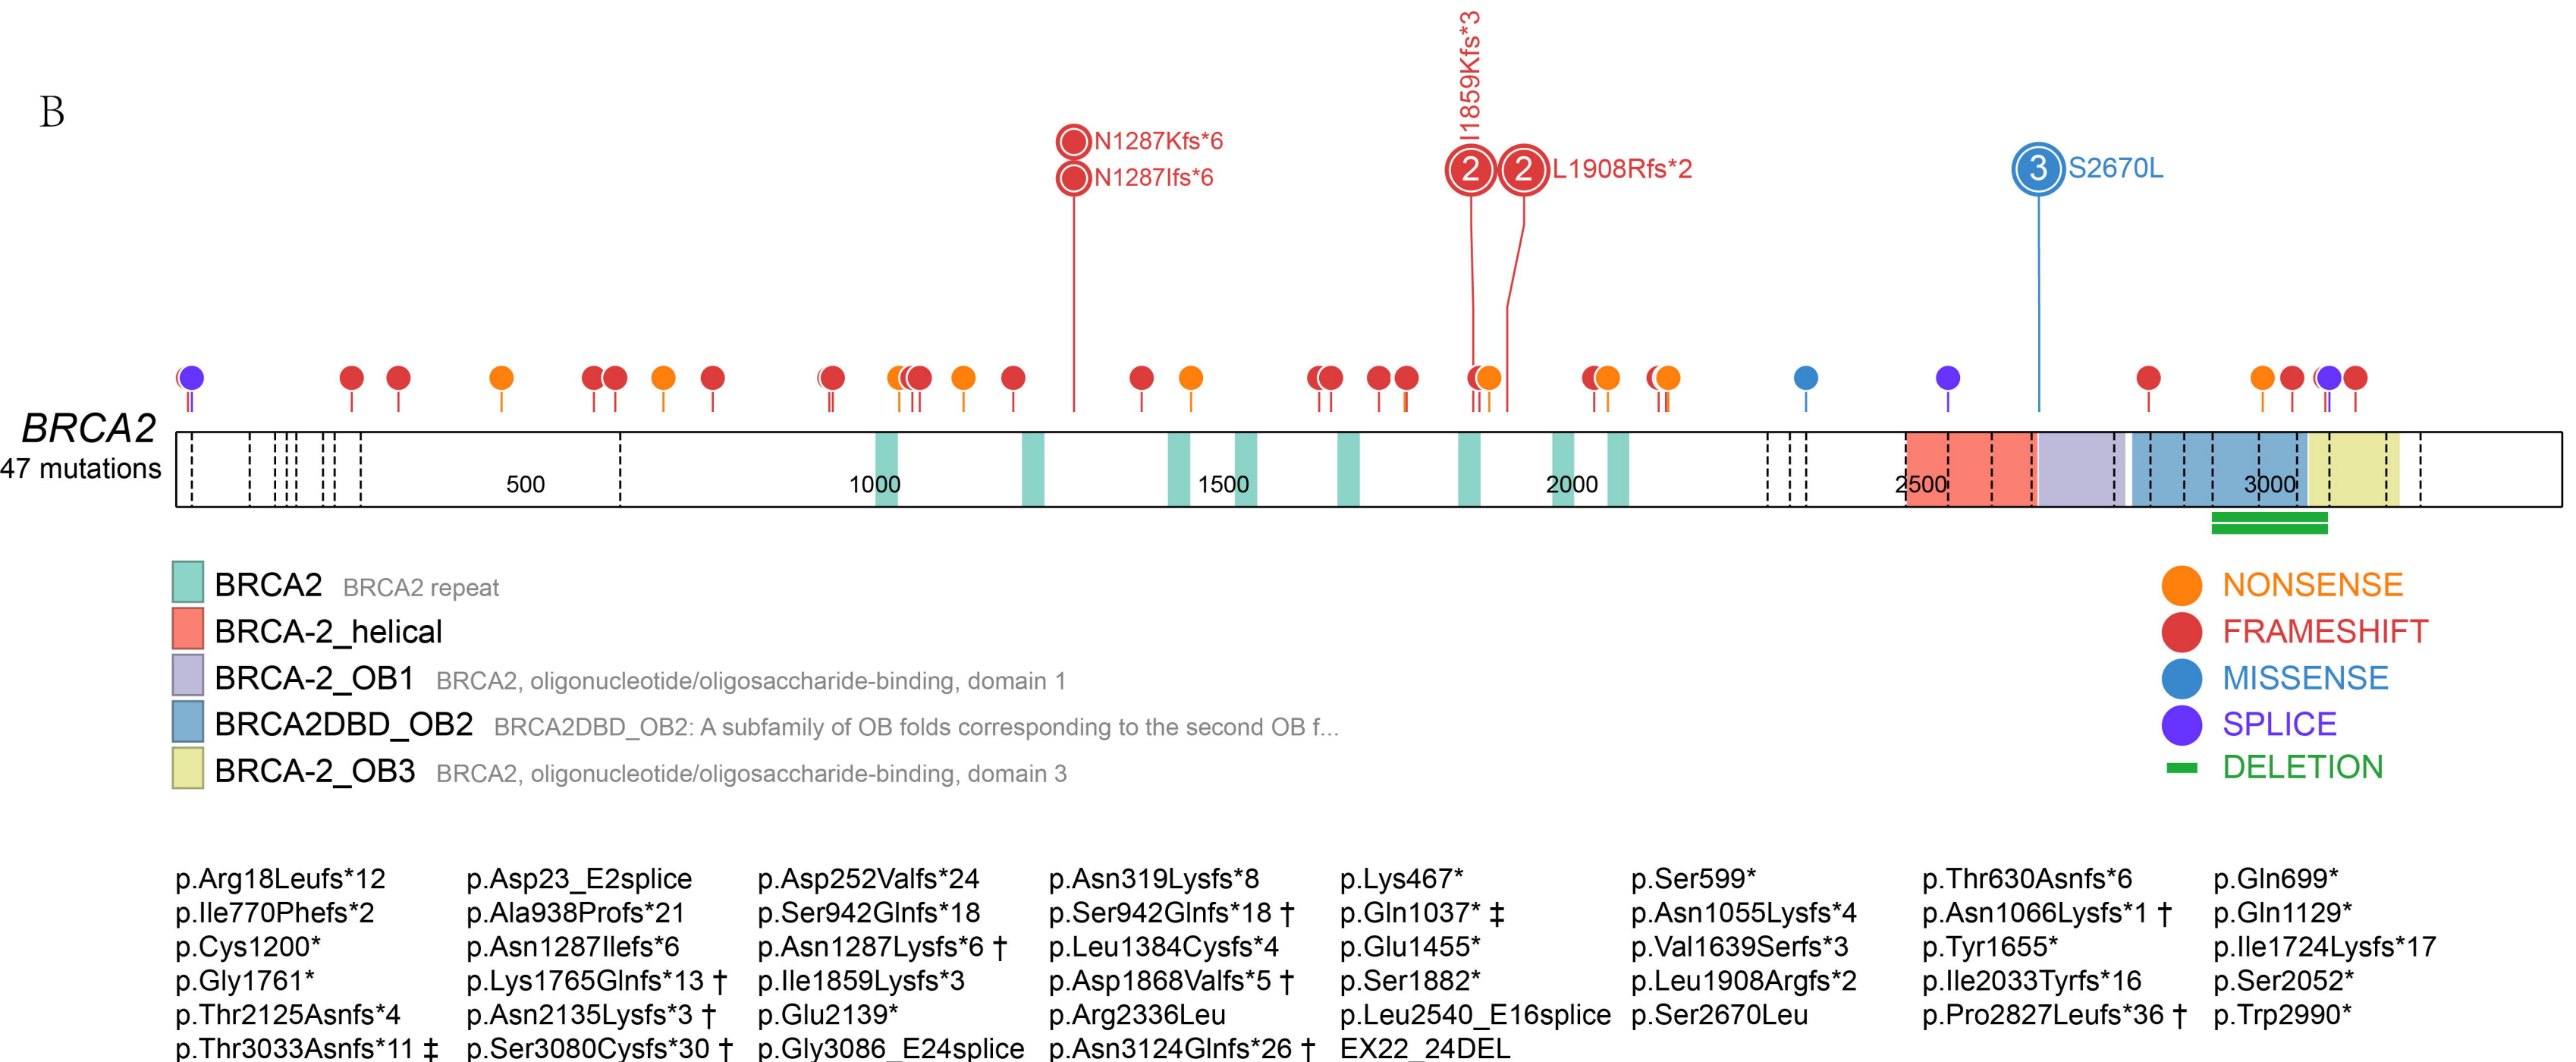

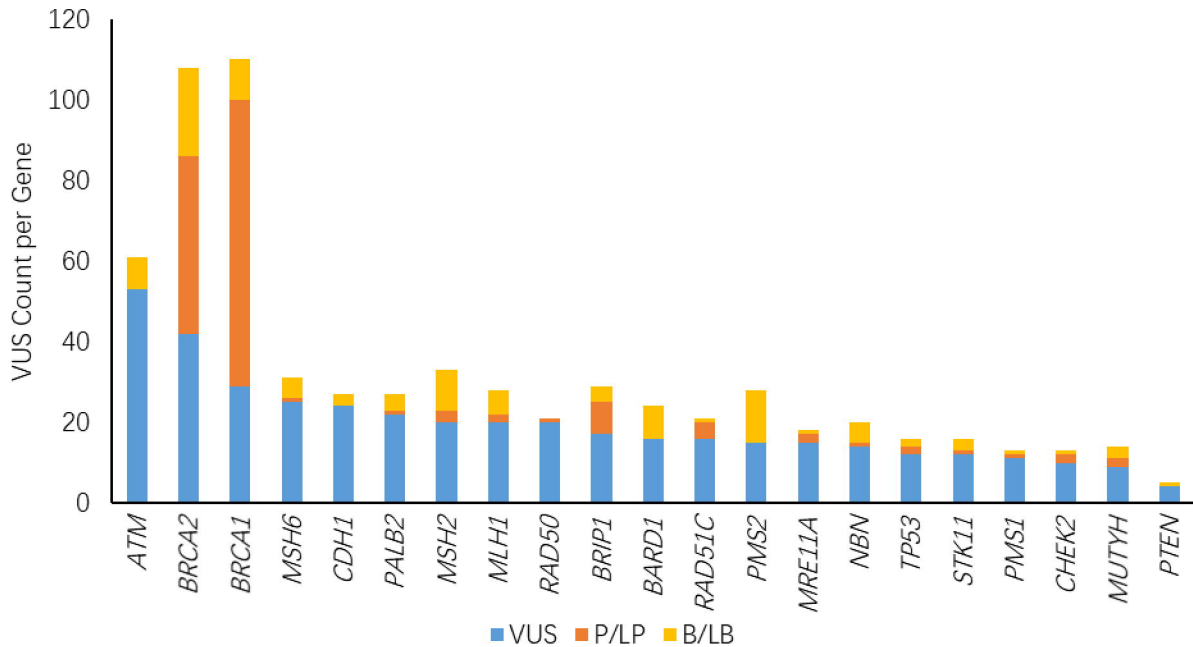

Source: http://biorxiv.org/content/10.1101/514539v1.full.pdf
